# Supplementary material for: Investigating the Contribution of Blending on the Dough Rheology of Roller-Milled Hard Red Wheat
Source: MDPI journal article supplement (doi:10.3390/foods12102078), 2023-05-22
Supplement: s1 [file s1]

## Supplemental data

**Table S1.** Effect of tempering moisture on particle characteristics and chemical properties of straight grade flours of wheat blends

| Tempering moisture (%) | Sample | Flour yield (%) | d10 (μm)    | d50 (μm)     | d90 (μm)      | Protein (%) | Damaged starch (%) | Ash (%)     |
|------------------------|--------|-----------------|-------------|--------------|---------------|-------------|--------------------|-------------|
| 14                     | HRW    | 69.4 (4.0)      | 22.93 (1.1) | 75.57 (14.7) | 139.36 (13.4) | 9.72 (0.3)  | 7.98 (1.1)         | 0.53 (0.10) |
|                        | B1     | 75.5 (1.3)      | 24.69 (2.6) | 79.26 (11.6) | 127.18 (12.0) | 10.74 (0.6) | 9.07 (1.4)         | 0.51 (0.07) |
|                        | B2     | 72.6 (1.6)      | 22.55 (1.7) | 69.45 (6.0)  | 135.95 (18.1) | 12.81 (0.4) | 8.07 (2.8)         | 0.54 (0.05) |
|                        | B3     | 73.2 (0.7)      | 25.88 (2.7) | 76.09 (6.8)  | 124.17 (4.9)  | 13.31 (1.4) | 9.09 (1.8)         | 0.48 (0.08) |
|                        | HRS    | 67.9 (4.2)      | 28.15 (3.1) | 83.82 (4.9)  | 146.53 (1.8)  | 16.14 (1.3) | 9.90 (2.6)         | 0.50 (0.16) |
| 16                     | HRW    | 76.9 (4.0)      | 22.30 (1.1) | 61.17 (4.6)  | 127.60 (3.9)  | 9.11 (0.5)  | 8.10 (0.9)         | 0.49 (0.11) |
|                        | B1     | 73.6 (2.2)      | 23.95 (2.1) | 79.82 (9.4)  | 129.45 (3.1)  | 10.89 (0.3) | 8.42 (1.1)         | 0.47 (0.09) |
|                        | B2     | 72.8 (2.3)      | 25.26 (0.7) | 81.04 (6.8)  | 151.17 (13.6) | 11.40 (0.7) | 9.86 (1.8)         | 0.45 (0.03) |
|                        | B3     | 73.3 (3.4)      | 23.40 (0.4) | 81.95 (5.9)  | 132.17 (5.0)  | 13.34 (1.8) | 8.79 (3.0)         | 0.56 (0.23) |
|                        | HRS    | 72.7 (2.8)      | 24.82 (2.3) | 83.68 (13.1) | 150.57 (7.8)  | 15.68 (0.3) | 10.32 (2.8)        | 0.54 (0.11) |
| 18                     | HRW    | 74.0 (6.1)      | 22.62 (1.0) | 70.34 (3.2)  | 128.49 (4.0)  | 9.40 (0.3)  | 8.89 (1.7)         | 0.53 (0.20) |
|                        | B1     | 73.9 (5.0)      | 21.66 (2.6) | 63.62 (5.5)  | 133.80 (8.8)  | 9.68 (0.9)  | 9.64 (1.6)         | 0.46 (0.12) |
|                        | B2     | 74.4 (4.2)      | 24.46 (1.9) | 74.76 (4.5)  | 135.90 (3.8)  | 11.42 (0.6) | 10.11 (1.5)        | 0.51 (0.17) |
|                        | B3     | 72.2 (1.3)      | 22.74 (2.4) | 75.24 (7.2)  | 133.65 (10.6) | 12.17 (1.3) | 9.37 (2.1)         | 0.49 (0.04) |
|                        | HRS    | 71.2 (2.0)      | 23.35 (1.7) | 71.13 (6.1)  | 131.97 (7.0)  | 15.82 (0.3) | 9.46 (3.7)         | 0.59 (0.08) |

The values are represented as mean (± standard deviation). HRW: Hard red winter, HRS: Hard red spring, B1: Blend 1 (75% HRW: 25% HRS), B2: Blend 2 (50% HRW: 50% HRS), B3: Blend 3 (25% HRW: 75% HRS)

**Table S2.** Effect of tempering time on particle characteristics and chemical properties of straight grade flours of wheat blends

| Tempering time (h) | Flour Yield |            | <i>d</i> 10       | <i>d</i> 50       | <i>d</i> 90       | Protein     | Damaged starch | Ash         |
|--------------------|-------------|------------|-------------------|-------------------|-------------------|-------------|----------------|-------------|
|                    | Sample      | (%)        | ( $\mu\text{m}$ ) | ( $\mu\text{m}$ ) | ( $\mu\text{m}$ ) | (%)         | (%)            | (%)         |
| 16                 | HRW         | 75.4 (3.5) | 21.96 (0.8)       | 66.38 (8.7)       | 132.87 (13.3)     | 9.45 (0.4)  | 9.05 (0.7)     | 0.48 (0.14) |
|                    | B1          | 74.5 (3.1) | 23.66 (2.3)       | 79.18 (12.1)      | 120.47 (7.9)      | 10.22 (0.9) | 8.35 (2.0)     | 0.50 (0.09) |
|                    | B2          | 75.5 (3.1) | 23.51 (2.4)       | 77.70 (4.5)       | 141.82 (13.1)     | 11.52 (0.8) | 10.37 (1.6)    | 0.39 (0.03) |
|                    | B3          | 71.9 (0.9) | 23.10 (0.5)       | 77.52 (7.1)       | 131.55 (12.3)     | 14.33 (0.8) | 10.35 (1.4)    | 0.45 (0.1)  |
|                    | HRS         | 71.4 (2.4) | 24.38 (1.1)       | 75.22 (3.1)       | 144.27 (6.1)      | 16.22 (1.2) | 9.07 (2.5)     | 0.52 (0.14) |
| 20                 | HRW         | 76.4 (3.0) | 22.96 (0.7)       | 65.96 (6.2)       | 117.61 (8.0)      | 9.30 (0.4)  | 8.61 (0.5)     | 0.56 (0.06) |
|                    | B1          | 75.7 (1.5) | 22.57 (4.3)       | 68.73 (7.0)       | 143.23 (13.4)     | 10.30 (0.3) | 8.64 (1.0)     | 0.46 (0.11) |
|                    | B2          | 73.6 (1.4) | 24.37 (2.3)       | 71.63 (8.1)       | 137.48 (15.4)     | 11.72 (0.8) | 9.82 (0.5)     | 0.50 (0.06) |
|                    | B3          | 74.5 (2.3) | 24.59 (1.0)       | 76.77 (3.8)       | 128.47 (5.1)      | 12.63 (2.2) | 10.09 (1.5)    | 0.57 (0.21) |
|                    | HRS         | 71.6 (1.1) | 26.31 (2.3)       | 80.86 (6.7)       | 141.18 (7.0)      | 15.92 (0.3) | 9.29 (1.7)     | 0.55 (0.1)  |
| 24                 | HRW         | 68.5 (4.0) | 22.93 (1.3)       | 74.75 (4.9)       | 144.98 (4.6)      | 9.47 (0.6)  | 10.09 (2.1)    | 0.61 (0.16) |
|                    | B1          | 72.8 (4.1) | 24.06 (1.0)       | 74.81 (4.0)       | 126.73 (4.9)      | 9.78 (1.3)  | 9.14 (2.0)     | 0.47 (0.09) |
|                    | B2          | 70.7 (0.4) | 24.40 (1.0)       | 75.93 (9.4)       | 143.72 (8.0)      | 11.84 (1.2) | 8.61 (3.0)     | 0.56 (0.12) |
|                    | B3          | 72.3 (1.6) | 24.32 (4.2)       | 78.99 (10.3)      | 129.97 (7.3)      | 13.85 (0.9) | 6.81 (0.8)     | 0.52 (0.07) |
|                    | HRS         | 68.8 (5.2) | 25.63 (5.2)       | 82.56 (7.1)       | 143.62 (7.5)      | 15.49 (0.3) | 9.52 (2.9)     | 0.55 (0.14) |

The values are represented as mean ( $\pm$  standard deviation). HRW: Hard red winter, HRS: Hard red spring, B1: Blend 1 (75% HRW: 25% HRS), B2: Blend 2 (50% HRW: 50% HRS), B3: Blend 3 (25% HRW: 75% HRS)

**Table S3.** Variation in particle characteristics and chemical properties of flour obtained from different milling streams (fraction)

| Milling<br>fraction | <i>d</i> 10       | <i>d</i> 50       | <i>d</i> 90       | Protein     | Damaged starch | Ash        |
|---------------------|-------------------|-------------------|-------------------|-------------|----------------|------------|
|                     | ( $\mu\text{m}$ ) | ( $\mu\text{m}$ ) | ( $\mu\text{m}$ ) | (%)         | (%)            | (%)        |
| 1BK                 | 40.78 (7.7)       | 96.89 (10.6)      | 167.19 (13.1)     | 13.47 (2.3) | 4.99 (1.3)     | 0.45 (0.2) |
| 2BK                 | 39.02 (6.2)       | 74.61 (8.7)       | 144.56 (8.9)      | 15.01 (3.0) | 5.44 (1.4)     | 0.45(0.2)  |
| 3BK                 | 31.76 (4.6)       | 79.89 (6.2)       | 128.97 (9.4)      | 16.89 (3.3) | 6.05 (1.6)     | 0.64 (0.2) |
| 1M                  | 24.78 (3.7)       | 74.61 (11.2)      | 134.10 (8.4)      | 11.73 (2.4) | 8.82 (2.0)     | 0.47 (0.2) |
| 2M                  | 22.45 (3.2)       | 69.05 (6.2)       | 128.11 (5.8)      | 11.31 (2.5) | 12.26 (2.7)    | 0.71 (0.2) |
| 3M                  | 20.00 (2.0)       | 60.05 (13.7)      | 122.2 (8.8)       | 12.58 (2.2) | 14.92 (2.6)    | 1.17 (0.2) |

The values are represented as mean ( $\pm$  standard deviation). 1BK: 1<sup>st</sup> break roll, 2BK: 2<sup>nd</sup> break roll, 3BK: 3<sup>rd</sup> break roll, 1M: 1<sup>st</sup> reduction roll, 2M: 2<sup>nd</sup> reduction roll, 3M: 3<sup>rd</sup> reduction roll.
